# Supplementary material for: Amino acid function and docking site prediction through combining disease variants, structure alignments, sequence alignments, and molecular dynamics: a study of the HMG domain
Source: PubMed Central journal article supplement (PMC3402923; doi:10.1186/1471-2105-13-s2-s3), 2012-03-13
Supplement: 1471-2105-13-S2-S3-S1.pdf [file 1471-2105-13-S2-S3-S1.pdf]

**Accession codes:**

**Swiss-Prot HMG proteins:** Q8WY36, Q96RK0, O60381, Q9NP66, Q9P0W2, Q3SYE8, P0C6E5, P09429, P26583, O15347, Q8WW32, Q9UGV6, Q12766, Q9UGU5, Q9UJU2, O96028, Q86U86, P54277, Q969G3, P23497, Q08945, P21675, P36402, Q9HCS4, Q9NQB0, Q00059, Q96NM4, O15405, O94842, O94900, P17480, P0CB47, P0CB48, and O75717;

**Swiss-Prot Human Sox proteins:** Q05066, P41225, O00570, P48431, Q06945, P35711, P35712, Q9BT81, P57073, P48436, P56693, P35716, O15370, Q9UN79, 4759162, O60248, Q9H6I2, P35713, Q9Y651, 30581117;

**Swiss-Prot Mammalian Sry proteins:** Q863D9, Q6T723, Q6T724, Q6TC44, Q863C2, Q864R2, Q864R1, Q864R0, Q864Q9, Q8SPQ2, Q27949, Q7JGF9, Q7JGF7, Q8SPQ1, Q9XS37, Q03255, Q69FB1, P51501, Q6TC43, Q9XT60, Q03256, Q863C0, Q9BH08, Q6TC37, Q864P9, Q864Q3, Q863B7, Q6TC27, Q6TC30, Q864Q7, Q6TC46, Q6TC50, Q864P4, P48046, Q864P7, P36390, P36389, Q05066, Q6TC40, Q28447, Q864Q5, Q864P8, Q6TC28, Q9BG90, Q864Q8, Q864Q4, Q6TC39, Q6TC38, Q6TC41, Q67EX7, Q67EX6, Q05738, Q62565, Q62563, Q864Q1, Q864P3, Q864P5, Q6TC36, Q28778, Q28798, Q864P6, Q6TC32, Q6TC31, Q864Q2, Q6TC33, Q864Q6, P36393, Q28783, Q6TC34, P36394, Q03257, P36395, Q864Q0, P36396, Q6TC45;

**Swiss-Prot Sox8 multispecies proteins (invertebrates and vertebrates):** P57073, Q04886, P57074, Q6VVD7, Q6IZ48, Q52W08, Q5BM60, E6ZGK0, Q38JF0, Q38PQ8, E2BS23, E2B1P3, D3ZR96, E2B1P2, E2R0K1, C3VV12;

**Swiss-Prot Sox9 multispecies proteins (invertebrates and vertebrates):** P48436, Q6F2E7, Q04887, B7ZR65, Q7YRJ7, P61753, Q9BG89, Q9BG91, P61754, P48434, O18896, Q8JIP0, Q9DE28, Q91WY3, Q0PV97, Q9YGP7, B0G0U8, Q0GA74, D0PQH0, D0PQH1, A8VM83, Q9DE39, A8VM79, Q9IB79, Q5EPK7,

Q08G17, C7B5N9, C7E9Q3, Q8UWL6, C6KJ53, D0PQG9, A8WDX1, C0HAA6, D9DB12, B4XTT2, Q9MY4, Q9BG92, O73842, Q2I8Y1, Q6B7J1, Q3ZN09, B2WSC3, Q1HQD4, B5ATG2, E2G4I5, A8TT17, B0LT39, B0LT40, B0LT41, Q7T1L4, A9YYK0, A4GNL7, Q6QQQ0, Q2NM26, Q2NM27, B0M178, D1LHP1, A0A8J7, D0VEC6, C0LEW2, D0VXZ7;

**Swiss-Prot Sox10 multispecies proteins (invertebrates and vertebrates):** P56693, Q04888, Q8AXX8, O55170, Q9W757, A5A763, A4I1J8, Q90XD1, Q08G18, B7PYW8, Q1I0U0, D1LHP2, Q06FD9;

**Swiss-Prot HMGB1 multispecies proteins (invertebrates and vertebrates):** P09429, P63158, P63159, P10103, Q7SZ42, Q6YKA4, Q08IE6, B0CM99, A9RA84, P12682, B1MTB0, P36194, Q4R844]

**PDB HMG proteins:** 2e6o, 2lef, 1gt0, 1o4x, 1hrz, 1j46, 2gzk, 2yul, 3f27, 1i11, 1wz6, 2crj, 1cg7, 1j5n, 1j3d, 1e7j, 1wxl

**PDB Sox-specific proteins:** 1j46, 1gto, 1o4x, 2gzk (Sry HMG domain only), 2yul, 3f27, 1i11

| Amino Acid | Normal | NV | Protein | Disease               | Reference            | Classification of Conservation    | HMG box | %      | Sox proteins | %   | Sry proteins | %      |
|------------|--------|----|---------|-----------------------|----------------------|-----------------------------------|---------|--------|--------------|-----|--------------|--------|
| 1          | R      | G  | Sry     | 45,X/46,X psu dic (Y) | [26]                 | Polar Basic                       | -       | -      | 20           | 100 | -            | -      |
| 2          | V      | L  | Sry     | GDXY                  | [27]                 | Hydrophobic                       | 57      | 82.609 | 20           | 100 | 75           | 100    |
| 2          | V      | A  | Sry     | GDXY                  | [28]                 |                                   |         |        |              |     |              |        |
| 4          | R      | G  | Sry     | GDXY                  | [29]                 | Polar Basic                       | 52      | 75.362 | 20           | 100 | 75           | 100    |
| 4          | G      | R  | HMGB1   | GCCL                  | [20]                 | Glycine                           | 6       | 8.6957 |              |     |              |        |
| 5          | P      | L  | Sox-9   | CMD1                  | [30]                 | Proline                           | 55      | 79.71  | 20           | 100 | 75           | 100    |
| 6          | M      | I  | Sry     | GDXY                  | [27]                 | Hydrophobic                       | 64      | 92.754 | 20           | 100 | 75           | 100    |
| 6          | M      | R  | Sry     | GDXY                  | [31]                 |                                   |         |        |              |     |              |        |
| 9          | F      | V  | Sry     | GDXY                  | [31]                 | Hydrophobic / Aromatic            | 65      | 94.203 | 20           | 100 | 75           | 100    |
| 9          | F      | L  | Sox-9   | CMD1                  | [32]                 |                                   |         |        |              |     |              |        |
| 9          | F      | S  | Sox-9   | CMD1                  | [33]                 |                                   |         |        |              |     |              |        |
| 10         | I      | T  | Sry     | GDXY                  | [34]                 | Hydrophobic                       | 58      | 84.058 | 20           | 100 | 75           | 100    |
| 12         | W      | R  | Sox-18  | HLTS                  | [35]                 | Hydrophobic / Aromatic            | 68      | 98.551 | 20           | 100 | 75           | 100    |
| 16         | A      | V  | Sox-9   | CMD1                  | [32] and [19]        | Alanine                           | 3       | 4.3478 | 3            | 15  | 0            | 0      |
| 18         | R      | S  | Sry     | GDXY, SR              | [36]                 | Polar Basic                       | 22      | 31.884 | 19           | 95  | 75           | 100    |
| 20         | M      | T  | Sry     | GDXY                  | [29]                 | Hydrophobic                       | 58      | 84.058 | 20           | 100 | 75           | 100    |
| 21         | A      | P  | Sox-18  | HLTS                  | [35]                 | Hydrophobic                       | 40      | 57.971 | 20           | 100 | 75           | 100    |
| 29         | N      | Y  | Sry     | GDXY, SR              | [37]                 | N or Q                            | 44      | 63.768 | 20           | 100 | 75           | 100    |
| 31         | E      | K  | Sry     | GDXY                  | [38]                 | Polar Acidic                      | 55      | 79.71  | 18           | 90  | 75           | 100    |
| 32         | I      | M  | Sry     | GDXY, TH              | [39]                 | Hydrophobic (no M)                | 63      | 91.304 | 20           | 100 | 75           | 100    |
| 33         | S      | G  | Sry     | GDXY, SR              | [40]                 | S or T                            | 44      | 63.768 | 20           | 100 | 75           | 100    |
| 33         | S      | T  | Sox-10  | YDBHS                 | [41]                 |                                   |         |        |              |     |              |        |
| 34         | K      | M  | Sry     | SR                    | [42]                 | Polar Basic                       | 56      | 81.159 | 19           | 95  | 75           | 100    |
| 36         | L      | W  | Sry     | TS                    | [Swiss-Prot: D0VTX0] | Hydrophobic                       | 57      | 82.609 | 20           | 100 | 75           | 100    |
| 37         | G      | E  | Sry     | GDXY                  | [43]                 | Glycine                           | 41      | 59.42  | 20           | 100 | 75           | 100    |
| 37         | G      | R  | Sry     | GDXY                  | [44] and [38]        |                                   |         |        |              |     |              |        |
| 40         | W      | R  | Sox-9   | CMD1                  | [30]                 | Hydrophobic / Aromatic            | 68      | 98.551 | 20           | 100 | 75           | 100    |
| 43         | L      | H  | Sry     | GDXY                  | [45]                 | Hydrophobic                       | 64      | 92.754 | 20           | 100 | 75           | 100    |
| 45         | A      | E  | HMGB1   | GCCL                  | [20]                 | Hydrophobic                       | 14      | 20.29  | 3            | 15  | 1            | 1.3333 |
| 48         | K      | I  | Sry     | GDXY                  | [39]                 | Polar Basic (with also Glutamine) | 69      | 100    | 20           | 100 | 75           | 100    |
| 49         | R      | P  | Sox-9   | CMD1                  | [30]                 | Polar Basic (with also Glutamine) | 37      | 53.623 | 16           | 80  | 22           | 29.333 |
| 50         | P      | R  | Sry     | GDXY                  | [46]                 | Proline                           | 26      | 37.681 | 20           | 100 | 75           | 100    |
| 51         | F      | S  | Sry     | GDXY                  | [47]                 | Hydrophobic / Aromatic            | 66      | 95.652 | 20           | 100 | 75           | 100    |
| 51         | F      | L  | Sox-9   | CMD1                  | [48]                 |                                   |         |        |              |     |              |        |
| 55         | A      | T  | Sry     | GDXY                  | [49]                 | Hydrophobic                       | 59      | 85.507 | 17           | 85  | 75           | 100    |
| 55         | A      | T  | Sox-9   | CMD1                  | [48]                 |                                   |         |        |              |     |              |        |
| 60         | A      | P  | Sry     | SR                    | [42]                 | Hydrophobic                       | 28      | 40.58  | 16           | 80  | 70           | 93.333 |
| 62         | H      | Y  | Sox-9   | CMD1                  | [19]                 | Polar Basic                       | 25      | 36.232 | 20           | 100 | 75           | 100    |
| 67         | P      | L  | Sry     | GDXY, SR              | [40]                 | Proline                           | 27      | 39.13  | 20           | 100 | 74           | 98.667 |
| 67         | P      | R  | Sox-9   | CMD1                  | [30]                 |                                   |         |        |              |     |              |        |
| 69         | Y      | C  | Sry     | GDXY, SR              | [50]                 | Hydrophobic / Aromatic            | 57      | 82.609 | 20           | 100 | 74           | 98.667 |
| 69         | Y      | F  | Sry     | GDXY                  | [51]                 |                                   |         |        |              |     |              |        |
| 69         | Y      | I  | Sry     | SR                    | [Swiss-Prot: D0VTX2] |                                   |         |        |              |     |              |        |
| 73         | P      | R  | Sry     | GDXY, SR              | [52]                 | Proline                           | -       | -      | 20           | 100 | -            | -      |
| 75         | R      | W  | Sry     | GDXY                  | [29]                 | Polar Basic                       | -       | -      | 16           | 80  | -            | -      |
| Total      |        |    |         |                       |                      |                                   | 69      |        | 20           |     | 75           |        |

**Table 1** Natural Variants (NVs) in HMG box proteins. Diseases: 45,X/46,X psu dic (Y)= mosaic sex karyotype, GDXY=gonadal dysgenesis (XY Female), GCCL=gastric-carcinoma cell line, CMD1=campomelic dysplasia, HLTS=hypotrichosis-lymphedema-telangiectasia, SR=sex reversal, TH= true hermaphroditism, YDBHS= Yemenite deaf-blind hypopigmentation syndrome, and TS= Turner syndrome. Classification of Conservation: Polar Basic=K,R,H; Hydrophobic=V,L,I,F,W,M,P; Hydrophobic/Aromatic=F,W,Y,H; Polar Acidic=D,E. Percent conservation is based on the number to the left divided by the total at the bottom.

**Figure S1**

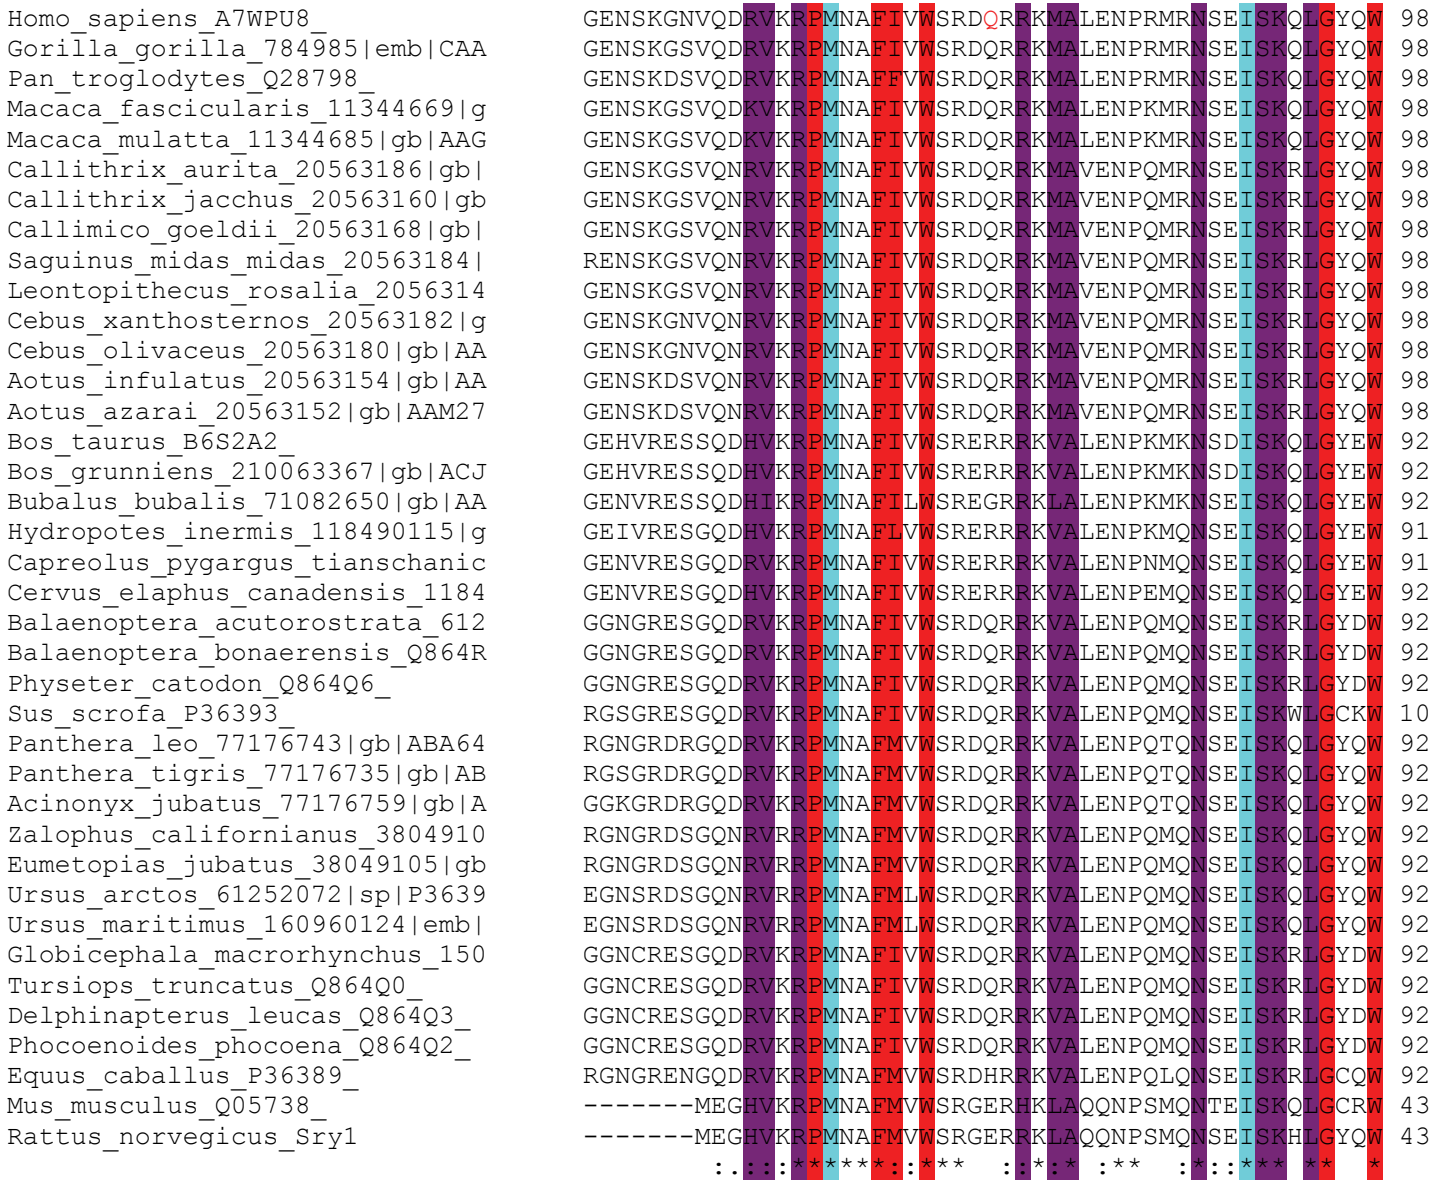

**Figure S1** Sequence alignments of 38 of the Mammalian Sry sequences showing conservation of the natural variant amino acids (Purple, red, and cyan) and the identified amino acids that may be interacting with androgen receptor (yellow).

|                                |                                                      |
|--------------------------------|------------------------------------------------------|
| Homo_sapiens_A7WPU8_           | KMLTEAEKWPFFQEAQKLQAMHREKYPNYKYRPRRKAKMLPKNCSSLPAD   |
| Gorilla_gorilla_784985 emb CAA | KMLTEAEKWPFFQEAQKLQAMHREKYPNYKYRPRRKAKMLPKNCSSLPAD   |
| Pan_troglodytes_Q28798_        | KMLTEAEKWPFFQEAQKLQAMHREKYPNYKYRPRRKANMLPKNCSSLPAD   |
| Macaca_fascicularis_11344669 g | KMLTEADKWPFFQEAQKLQAMHREKYPNYKYRPRRKAKMLQNSCSSLPAD   |
| Macaca_mulatta_11344685 gb AAG | KMLTEADKWPFFQEAQKLQAMHREKYPNYKYRPRRKAKMLQNSCSSLPAD   |
| Callithrix_aurita_20563186 gb  | KLLTEAEKWPFFQEAQKLQAMHREKYPNYKYRPRRKANMLQNNDSLLTAD   |
| Callithrix_jacchus_20563160 gb | KLLTEAEKWPFFQEAQKLQAMHREKYPNYKYRPRRKANMLQNNDSLLTAD   |
| Callimico_goeldii_20563168 gb  | KLLTEAEKWPFFQEAQKLQAMHREKYPNYKYRPRRKANMLQNNDSLLTAN   |
| Saguinus_midás_midás_20563184  | KLLTEAEKWPFFQEAQKLQAMHREKYPNYKYRPRRKANMLQNN-SLLTAD   |
| Leontopithecus_rosalia_2056314 | KLLTEAEKWPFFQEAQKLQAMHREKYPNYKYRPRRKANMLQNNDSLLNAD   |
| Cebus_xanthosternos_20563182 g | KLLSEAEKWPFFQEAQKLQAMHREKYPNYKYRPRRKANLLQNNDSLRPAD   |
| Cebus_olivaceus_20563180 gb AA | KLLTEAEKWPFFQEAQKLQAMHREKYPNYKYRPRRKANLLQNNDSLRPAD   |
| Aotus_infulatus_20563154 gb AA | KLLTEAEKWPFFQEAQKLQAMHREKYPNYKYRPRRKANVLQNNESFLPAD   |
| Aotus_azarai_20563152 gb AAM27 | KLLTEAEKWPFFQEAQKLQAMHREKYPNYKYRPRRKANVLQNNESFLPAD   |
| Bos_taurus_B6S2A2_             | KRLTDAEKRPFFEEAQRLLAIHRDKYPGYKYRPRRRAK---RPQKSLPAD   |
| Bos_grunniens_210063367 gb ACJ | KRLTDAEKRPFFEEAQRLLAIHRDKYPGYKYRPRRRAK---RPQKSLPAD   |
| Bubalus_bubalis_71082650 gb AA | KRLTDAEKRPFFEEAQRLLS IHRDKYPGYKYRPRRKAK---RLQKSLPAD  |
| Hydropotes_inermis_118490115 g | KRLTAAEKRPFFEEAQRLLAIHRDKYPGYKYRPRRKT---RQKQLLPAD    |
| Capreolus_pygargus_tianschanic | KRLTDAEKRPFFEEAQRLLAIHRDKYPGYKYRPRRKT---RQKQLLPAD    |
| Cervus_elaphus_canadensis_1184 | KRLTDAEKRPFFEEAQRLLAVHRDKYPGYKYRPRRKT---RQKQLLPAD    |
| Balaenoptera_acutorostrata_612 | KMLTEAEKQPFEEAQRLLRAMHRDKYPGYKYRPRRKAK---RPQKQLLPAD  |
| Balaenoptera_bonaerensis_Q864R | KMLTEAEKQPFEEAQRLLRAMHRDKYPGYKYRPRRKAK---RPQKQLLPAD  |
| Physeter_catodon_Q864Q6_       | KMLTEAEKQPFEEAQRLLRAMHRDKYPGYKYRPRRKAK---RPQKQLLPAD  |
| Sus_scrofa_P36393_             | KMLTEAEKRPFFEEAQRQLQAVHRDKYPGYKYRPRRKGE---RAQNLLPAE  |
| Panthera_leo_77176743 gb ABA64 | KMLTEAEKWPFFEEAQRQLQALHREKYPGYKYRPRRKATPEKSDKLLPAE   |
| Panthera_tigris_77176735 gb AB | KMLTEAEKWPFFEEAQRQLQALHREKYPGYKYRPRRKATPEKSDKLLPAE   |
| Acinonyx_jubatus_77176759 gb A | KMLTEAEKWPFFEEAQRQLQALHREKYPGYKYRPRRKATPEKSDKLLPAD   |
| Zalophus_californianus_3804910 | KMLTEAEKWPFFEEAQRQLQAVHREKYPDYKYRPRRKALPQKSDKLLPAA   |
| Eumetopias_jubatus_38049105 gb | KMLTEAEKWPFFEEAQRQLQAVHREKYPDYKYRPRRKALPQKSDKLLPAA   |
| Ursus_arctos_61252072 sp P3639 | EMLTEAEKWPFFEEAQRQLQAMHRQKYPDYKYRPRRKATPQKDDKLLPSA   |
| Ursus_maritimus_160960124 emb  | KMLTEAEKWPFFEEAQRQLQAMHRQKYPDYKYRPRRKATPQKDDKLLPSA   |
| Globicephala_macrorhynchus_150 | KMLTEAEKQPFEEAQRLLRAMHRDKYPGYKYRPRRKAKEATEIASRRLFS   |
| Tursiops_truncatus_Q864Q0_     | KMLTEAEKQPFEEAQRLLRAMHRDKYPGYKYRPRRKAKEATEIASRRLFS   |
| Delphinapterus_leucas_Q864Q3_  | KMLTEAEKQPFEEAQRLLRAMHRDKYPGYKYRPRRKAKEATEIASRRLFS   |
| Phocoenoides_phocoena_Q864Q2_  | KMLTEAEKQPFEEAQRLLRAMHRDKYPGYKYRPRRKAKEATEIASRRLFS   |
| Equus_caballus_P36389_         | KMLTEAEKLPFFEEAQRLLRAMHQEKYPDYKYRPRRKAKMPQKSDKPLPQT  |
| Mus_musculus_Q05738_           | KSLTEAEKRPFFQEAQRLLKILHREKYPNYKYQPHRRAKVQSQRSGILQPAV |
| Rattus_norvegicus_Sry1         | KSLTEAEKRPFFQEAQRLLKTLHREKYPNYKYQPHRRVKVPQRSYTLQREV  |
|                                | : *: *: * ***:***:* :*::***.***:***:                 |

**Figure S1 (Cont.)** Sequence alignments of 38 of the Mammalian Sry sequences showing conservation of the natural variant amino acids (Purple, red, and cyan) and the identified amino acids that may be interacting with androgen receptor (yellow).

Figure S2

sp|Q6F2E7|105-173\_Xenopus\_trop VKRPMNAFMVWAQAARRKLDQYPHLHNAELSKTLGKLRLLNEGEKRPF 50  
Q9IB79\_Glandirana\_rugosa VKRPMNAFMVWAQAARRKLDQYPHLHNAELSKTLGKLRLLNETEKRPF 50  
Q0GA74\_Bufo\_bufo VKRPMNAFMVWAQAARRKLDQYPHLHNAELSKTLGKLRLLNESEKRPF 50  
C0LEW2\_Bufo\_marinus VKRPMNAFMVWAQAARRKLDQYPHLHNAELSKTLGKLRLLNESEKRPF 50  
sp|P48436|105-173\_Homo\_sapiens VKRPMNAFMVWAQAARRKLDQYPHLHNAELSKTLGKLRLLNESEKRPF 50  
A8WDX1\_Trachemys\_scripta\_elega -KRPMAFMVWAQAARRKLDQYPHLHNAELSKTLGKLRLLNESEKRPF 49  
sp|Q7YRJ7|105-173\_Canis\_famili VKRPMNAFMVWAQAARRKLDQYPHLHNAELSKTLGKLRLLNESEKRPF 50  
sp|Q9BG91|105-173\_Callithrix\_j VKRPMNAFMVWAQAARRKLDQYPHLHNAELSKTLGKLRLLNESEKRPF 50  
sp|O18896|105-173\_Sus\_scrofa VKRPMNAFMVWAQAARRKLDQYPHLHNAELSKTLGKLRLLNESEKRPF 50  
C7B5N9\_Crocodylus\_palustris VKRPMNAFMVWAQAARRKLDQYPHLHNAELSKTLGKLRLLNESEKRPF 50  
Q9BG92\_Hylabates VKRPMNAFMVWAQAARRKLDQYPHLHNAELSKTLGKLRLLNESEKRPF 50  
B0LT41\_Nyctereutes\_procyonoide VKRPMNAFMVWAQAARRKLDQYPHLHNAELSKTLGKLRLLNESEKRPF 50  
D1LHP1\_Monodelphis\_domestica VKRPMNAFMVWAQAARRKLDQYPHLHNAELSKTLGKLRLLNESEKRPF 50  
sp|Q04887|105-173\_Mus\_musculus VKRPMNAFMVWAQAARRKLDQYPHLHNAELSKTLGKLRLLNESEKRPF 50  
O73842\_Calotes\_versicolor VKRPMNAFMVWAQAARRKLDQYPHLHNAQLSKTLGKLRLLNESEKRPF 50  
sp|P61753|105-173\_Macaca\_mulat VKRPMNAFMVWAQAARRKLDQYPHLHNAELSKTLGKLRLLNESEKRPF 50  
sp|P61754|105-173\_Pongo\_pygmae VKRPMNAFMVWAQAARRKLDQYPHLHNAELSKTLGKLRLLNESEKRPF 50  
Q9DE28\_Eublepharis\_macularius VKRPMNAFMVWAQAARRKLDQYPHLHNAELSKTLGKLRLLNESEKRPF 50  
C7E9Q3\_Lepidochelys\_olivacea VKRPMNAFMVWAQAARRKLDQYPHLHNAELSKTLGKLRLLNESEKRPF 50  
B0LT39\_Vulpes\_vulpes VKRPMNAFMVWAQAARRKLDQYPHLHNAELSKTLGKLRLLNESEKRPF 50  
Q2NM26\_Coturnix\_coturnix VKRPMNAFMVWAQAARRKLDQYPHLHNAELSKTLGKLRLLNESEKRPF 50  
A0A8J7\_Trimeresurus\_flavovirid VKRPMNAFMVWAQAARRKLDQYPHLHNAELSKTLGKLRLLNESEKRPF 50  
D0VXZ7\_Leiolepis\_reevesii VKRPMNAFMVWAQAARRKLDQYPHLHNAELSKTLGKLRLLNESEKRPF 50  
Q2NM27\_Anas\_platyrhynchos VKRPMNAFMVWAQAARRKLDQYPHLHNAELSKTLGKLRLLNESEKRPF 50  
B0LT40\_Vulpes\_lagopus VKRPMNAFMVWAQAARRKLDQYPHLHNAELSKTLGKLRLLNESEKRPF 50  
Q9MY4\_Bos\_taurus VKRPMNAFMVWAQAARRKLDQYPHLHNAELSKTLGKLRLLNESEKRPF 50  
Q9YGP7\_Alligator\_mississippien VKRPMNAFMVWAQAARRKLDQYPHLHNAELSKTLGKLRLLNESEKRPF 50  
sp|P48434|106-174\_Gallus\_gallu VKRPMNAFMVWAQAARRKLDQYPHLHNAELSKTLGKLRLLNESEKRPF 50  
Q91WY3\_Rattus\_norvegicus VKRPMNAFMVWAQAARRKLDQYPHLHNAELSKTLGKLRLLNESEKRPF 50  
sp|Q9BG89|105-173\_Pan\_troglody VKRPMNAFMVWAQAARRKLDQYPHLHNAELSKTLGKLRLLNESEKRPF 50  
A8VM83\_Ctenopharyngodon\_idella -KRPMAFMVWAQAARRKLDQYPHLHNAELSKTLGKLRLLNEGEKRPF 49  
A8VM79\_Mylopharyngodon\_piceus -KRPMAFMVWAQAARRKLDQYPHLHNAELSKTLGKLRLLNEGEKRPF 49  
D9DB12\_Xenocypris\_davidi -KRPMAFMVWAQAARRKLDQYPHLHNAELSKTLGKLRLLNEGEKRPF 49  
B4XTT2\_Carassius\_carassius -KRPMAFMVWAQAARRKLDQYPHLHNAELSKTLGKLRLLNEGEKRPF 49  
B2WSC3\_Megalobrama\_amblycephal -KRPMAFMVWAQAARRKLDQYPHLHNAELSKTLGKLRLLNEGEKRPF 49  
A9YYK0\_Carassius\_carassius -KRPMAFMVWAQAARRKLDQYPHLHNAELSKTLGKLRLLNEGEKRPF 49  
A4GNL7\_Megalobrama\_amblycephal -KRPMAFMVWAQAARRKLDQYPHLHNAELSKTLGKLRLLNEGEKRPF 49  
Q6QQQ0\_Carassius\_auratus -KRPMAFMVWAQAARRKLDQYPHLHNAELSKTLGKLRLLNEGEKRPF 49  
sp|B7ZR65|105-173\_Xenopus\_laev VKRPMNAFMVWAQAARRKLDQYPHLHNAELSKTLGKLRLLNEGEKRPF 50  
Q8JIP0\_Oryzias\_latipes VKRPMNAFMVWAQAARRKLDQYPHLHNAELSKTLGKLRLLNEGEKRPF 50  
D0PQH0\_Leucoraja\_erinacea VKRPMNAFMVWAQAARRKLDQYPHLHNAELSKTLGKLRLLNEGEKRPF 50  
Q9DE39\_Oncorhynchus\_mykiss VKRPMNAFMVWAQAARRKLDQYPHLHNAELSKTLGKLRLLNEGEKRPF 50  
B0G0U8\_Oreochromis\_aureus VKRPMNAFMVWAQAARRKLDQYPHLHNAELSKTLGKLRLLNEGEKRPF 50  
D0PQG9\_Scylliorhinus\_canicula VKRPMNAFMVWAQAARRKLDQYPHLHNAELSKTLGKLRLLNEGEKRPF 50  
D0PQH1\_Acipenser\_baerii VKRPMNAFMVWAQAARRKLDQYPHLHNAELSKTLGKLRLLNEGEKRPF 50  
Q5EPK7\_Acipenser\_sturio VKRPMNAFMVWAQAARRKLDQYPHLHNAELSKTLGKLRLLNEGEKRPF 50  
Q08G17\_Acipenser\_schrenckii VKRPMNAFMVWAQAARRKLDQYPHLHNAELSKTLGKLRLLNEGEKRPF 50  
C0HAA6\_Salmo\_salar VKRPMNAFMVWAQAARRKLDQYPHLHNAELSKTLGKLRLLNEGEKRPF 50  
B5ATG2\_Pleurodeles\_waltl VKRPMNAFMVWAQAARRKLDQYPHLHNAELSKTLGKLRLLNEGEKRPF 50  
E2G4I5\_Andrias\_davidianus VKRPMNAFMVWAQAARRKLDQYPHLHNAELSKTLGKLRLLNEGEKRPF 50  
D0VEC6\_Sebastiscus\_marmoratus VKRPMNAFMVWAQAARRKLDQYPHLHNAELSKALGKLRLLNEGEKRPF 50  
Q0PV97\_Poecilia\_reticulata VKRPMNAFMVWAQAARRKLDQYPHLHNAELSKTLGKLRLLNEVEKRPF 50  
Q8UWL6\_Takifugu\_rubripes VKRPMNAFMVWAQAARRKLDQYPHLHNAELSKTLGKLRLLNEVEKRPF 50  
C6KJ53\_Epinephelus\_coioides VKRPMNAFMVWAQAARRKLDQYPHLHNAELSKTLGKLRLLNEVEKRPF 50  
Q6B7J1\_Epinephelus\_akaara VKRPMNAFMVWAQAARRKLDQYPHLHNAELSKTLGKLRLLNEVEKRPF 50  
Q1HQD4\_Odontesthes\_hatcheri VKRPMNAFMVWAQAARRKLDQYPHLHNAELSKTLGKLRLLNEVEKRPF 50  
A8TT17\_Cynoglossus\_semilaevis VKRPMNAFMVWAQAARRKLDQYPHLHNAELSKTLGKLRLLNEVEKRPF 50  
Q7T1L4\_Odontesthes\_bonariensis VKRPMNAFMVWAQAARRKLDQYPHLHNAELSKTLGKLRLLNEVEKRPF 50  
Q2I8Y1\_Petromyzon\_marinus VKRPMNAFMVWAQAARRKLDQYPHLHNAELSKTLGKLRLLSENEKRPF 50

\*\*\*:.. \*:\*:..: \*:\*:\*:\*:\* \*\* \*:\*:\*: \*\*:\*\*

**Figure S2 (Cont.)**

|                                |                     |    |
|--------------------------------|---------------------|----|
| sp Q6F2E7 105-173_Xenopus_trop | VEEAERLRIQHKKDHPDYK | 69 |
| Q9IB79_Glandirana_rugosa       | VEEAERLRIQHKKDHPDYK | 69 |
| Q0GA74_Bufo_bufo               | VEEAERLRIQHKKDHPDYK | 69 |
| C0LEW2_Bufo_marinus            | VEEAERLRIQHKKDHPDYK | 69 |
| sp P48436 105-173_Homo_sapiens | VEEAERLRVQHKKDHPDYK | 69 |
| A8WDX1_Trachemys_scripta_elega | VEEAERLRVQHKKDHPDYK | 68 |
| sp Q7YRJ7 105-173_Canis_famili | VEEAERLRVQHKKDHPDYK | 69 |
| sp Q9BG91 105-173_Callithrix_j | VEEAERLRVQHKKDHPDYK | 69 |
| sp O18896 105-173_Sus_scrofa   | VEEAERLRVQHKKDHPDYK | 69 |
| C7B5N9_Crocodylus_palustris    | VEEAERLRVQHKKDHPDYK | 69 |
| Q9BG92_Hylobates               | VEEAERLRVQHKKDHPDYK | 69 |
| B0LT41_Nyctereutes_procyonoide | VEEAERLRVQHKKDHPDYK | 69 |
| D1LHP1_Monodelphis_domestica   | VEEAERLRVQHKKDHPDYK | 69 |
| sp Q04887 105-173_Mus_musculus | VEEAERLRVQHKKDHPDYK | 69 |
| O73842_Calotes_versicolor      | VEEAERLRVQHKKDHPDYK | 69 |
| sp P61753 105-173_Macaca_mulat | VEEAERLRVQHKKDHPDYK | 69 |
| sp P61754 105-173_Pongo_pygmae | VEEAERLRVQHKKDHPDYK | 69 |
| Q9DE28_Eublepharis_macularius  | VEEAERLRVQHKKDHPDYK | 69 |
| C7E9Q3_Lepidochelys_olivacea   | VEEAERLRVQHKKDHPDYK | 69 |
| B0LT39_Vulpes_vulpes           | VEEAERLRVQHKKDHPDYK | 69 |
| Q2NM26_Coturnix_coturnix       | VEEAERLRVQHKKDHPDYK | 69 |
| A0A8J7_Trimeresurus_flavovirid | VEEAERLRVQHKKDHPDYK | 69 |
| D0VXZ7_Leiolepis_reevesii      | VEEAERLRVQHKKDHPDYK | 69 |
| Q2NM27_Anas_platyrhynchos      | VEEAERLRVQHKKDHPDYK | 69 |
| B0LT40_Vulpes_lagopus          | VEEAERLRVQHKKDHPDYK | 69 |
| Q9MY4_Bos_taurus               | VEEAERLRVQHKKDHPDYK | 69 |
| Q9YGP7_Alligator_mississippien | VEEAERLRVQHKKDHPDYK | 69 |
| sp P48434 106-174_Gallus_gallu | VEEAERLRVQHKKDHPDYK | 69 |
| Q91WY3_Rattus_norvegicus       | VEEAERLRVQHKKDHPDYK | 69 |
| sp Q9BG89 105-173_Pan_troglody | VEEAERLRVQHKKDHPDYK | 69 |
| A8VM83_Ctenopharyngodon_idella | VEEAERLRVQHKKDHPDYK | 68 |
| A8VM79_Mylopharyngodon_piceus  | VEEAERLRVQHKKDHPDYK | 68 |
| D9DB12_Xenocypris_davidi       | VEEAERLRVQHKKDHPDYK | 68 |
| B4XTT2_Carassius_carassius     | VEEAERLRVQHKKDHPDYK | 68 |
| B2WSC3_Megalobrama_amblycephal | VEEAERLRVQHKKDHPDYK | 68 |
| A9YYK0_Carassius_carassius     | VEEAERLRVQHKKDHPDYK | 68 |
| A4GNL7_Megalobrama_amblycephal | VEEAERLRVQHKKDHPDYK | 68 |
| Q6QQQ0_Carassius_auratus       | VEEAERLRVQHKKDHPDYK | 68 |
| sp B7ZR65 105-173_Xenopus_laev | VEEAERLRVQHKKDHPDYK | 69 |
| Q8JIP0_Oryzias_latipes         | VEEAERLRVQHKKDHPDYK | 69 |
| D0PQH0_Leucoraja_erinacea      | VEEAERLRVQHKKDHPDYK | 69 |
| Q9DE39_Oncorhynchus_mykiss     | VEEAERLRVQHKKDHPDYK | 69 |
| B0G0U8_Oreochromis_aureus      | VEEAERLRVQHKKDHPDYK | 69 |
| D0PQG9_Scylliorhinus_canicula  | VEEAERLRVQHKKDHPDYK | 69 |
| D0PQH1_Acipenser_baerii        | VEEAERLRVQHKKDHPDYK | 69 |
| Q5EPK7_Acipenser_sturio        | VEEAERLRVQHKKDHPDYK | 69 |
| Q08G17_Acipenser_schrenckii    | VEEAERLRVQHKKDHPDYK | 69 |
| C0HAA6_Salmo_salar             | VEEAERLRVQHKKDHPDYK | 69 |
| B5ATG2_Pleurodeles_waltl       | VEEAERLRVQHKKDHPDYK | 69 |
| E2G4I5_Andrias_davidianus      | VEEAERLRVQHKKDHPDYK | 69 |
| D0VEC6_Sebastiscus_marmoratus  | VEEAERLRVQHKKDHPDYK | 69 |
| Q0PV97_Poecilia_reticulata     | VEEAERLRVQHKKDHPDYK | 69 |
| Q8UWL6_Takifugu_rubripes       | VEEAERLRVQHKKDHPDYK | 69 |
| C6KJ53_Epinephelus_coioides    | VEEAERLRVQHKKDHPDYK | 69 |
| Q6B7J1_Epinephelus_akaara      | VEEAERLRVQHKKDHPDYK | 69 |
| Q1HQD4_Odontesthes_hatcheri    | VEEAERLRVQHKKDHPDYK | 69 |
| A8TT17_Cynoglossus_semilaevis  | VEEAERLRVQHKKDHPDYK | 69 |
| Q7T1L4_Odontesthes_bonariensis | VEEAERLRVQHKKDHPDYK | 69 |
| Q2I8Y1_Petromyzon_marinus      | VEEAERLRVQHKKDHPDYK | 69 |

::::\*\*\* \* ::\*\*\*

**Figure S2 (Pages 6-7)** Sequence alignments of Sox9 sequences showing amino acid 16 (green) and the conservation of the amino acids interacting with androgen receptor (yellow).

**Figure S3**

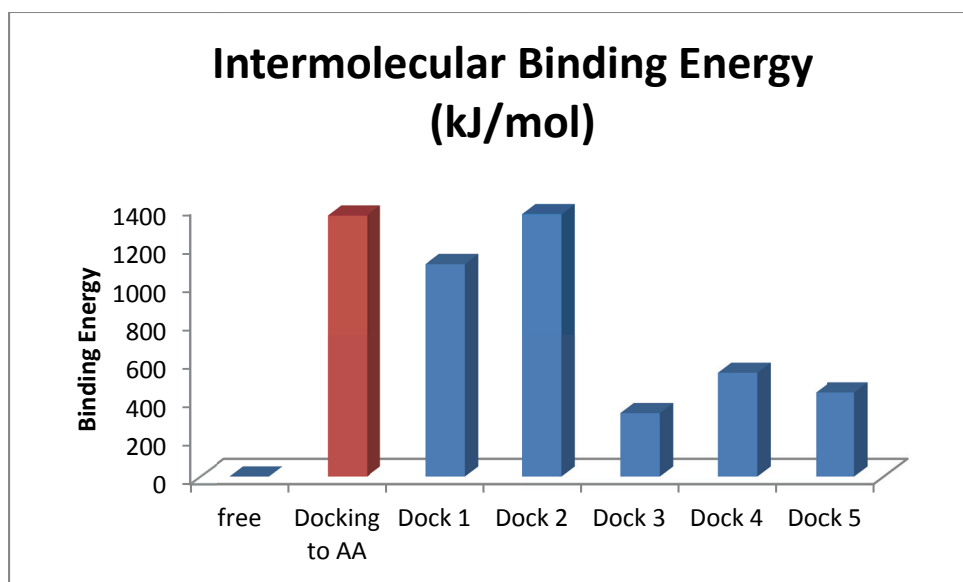

**Figure S3** Binding energies of the AR CTE segment either free, in the form proposed to interact with the conserved amino acids of Sry (Docking to AA, red), or five predictions of docking sites using AutoDock. Dock1 and Dock2 produced similar energy as the proposed interaction. Dock 1 was located close to the predicted site of conservation and may serve some role in interaction but with lower energy of formation, while dock2 fell outside the HMG box and thus not relative to known interaction sites (that the interaction occurs in the HMG box).



Figure S4

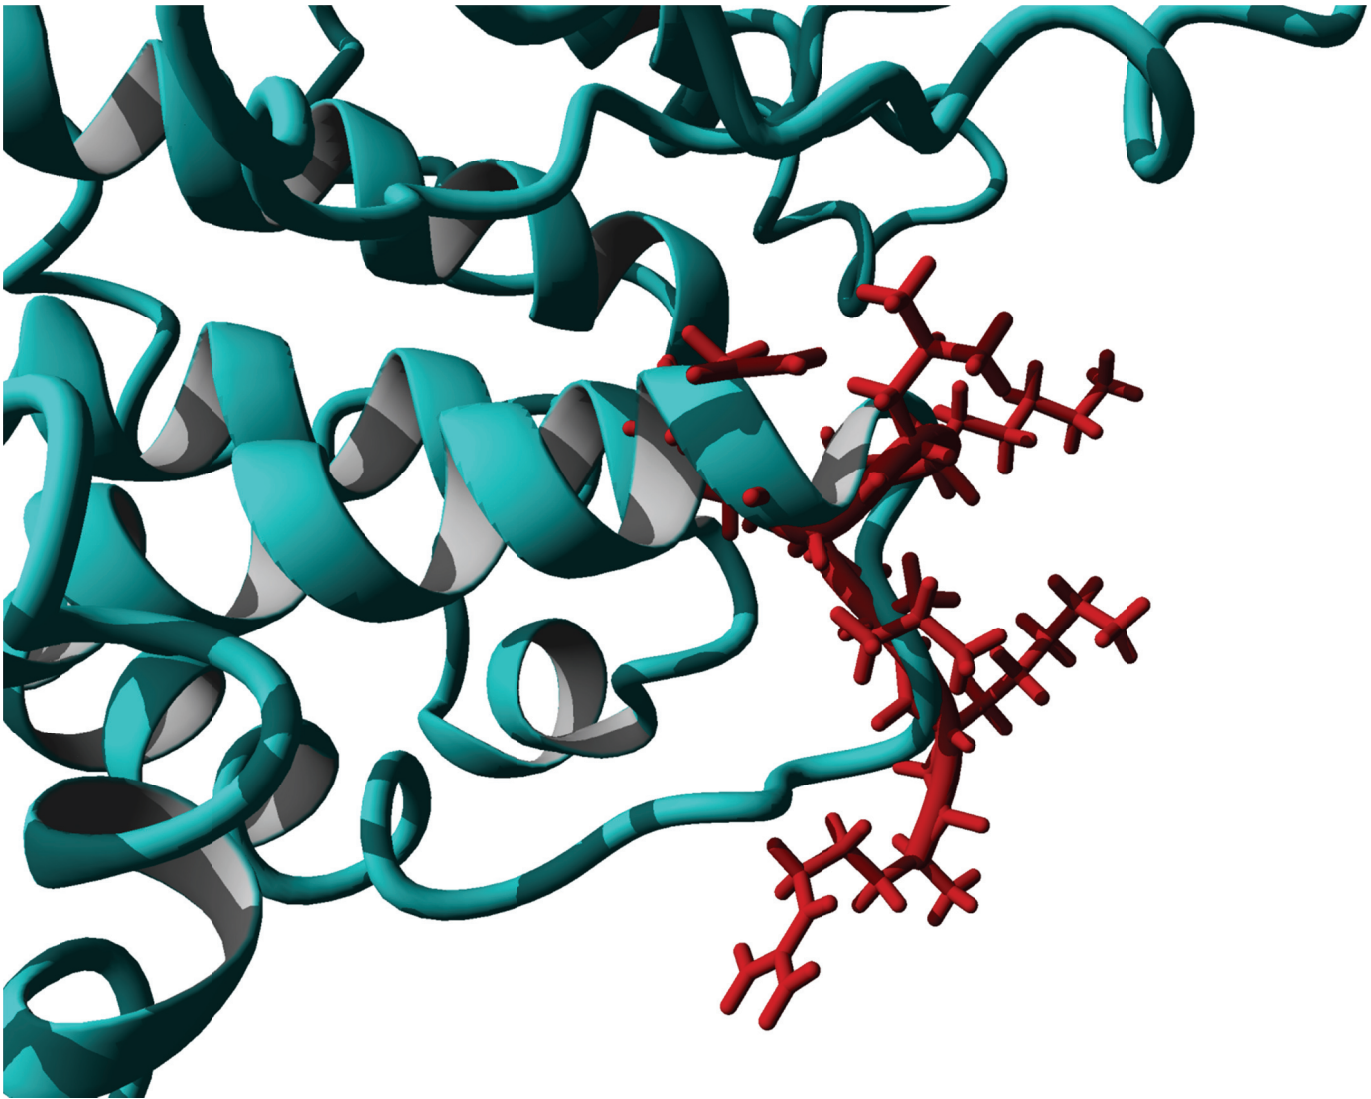

**Figure S4** Alignment of the AR CTE segment in the confirmation of its docking to Sry and DNA aligned with a model created of the full AR (RMSD of 1.253Å over 7 amino acids) using I-TASSER. High homology in structure predicts an increase likelihood that the folding seen in docking studies of the CTE may be found in nature that favors the interaction with the Sry site.

## Additional References:

26. Fernandez R, Marchal JA, Sanchez A, Pasaro E: **A Point mutation, R59G, within the HMG-SRY box in a female 45,X/46,X,psu dic(Y).** *Hum Genet* 2002, **111**:242-246.
27. Berta P, Hawkins JR, Sinclair AH, Taylor A, Griffiths BL, Goodfellow PN, Fellous M: **Genetic evidence equating SRY and the testis-determining factor.** *Nature* 1990, **348**:448-450.
28. Hiort O, Gramss B, Klauber GT: **True hermaphroditism with 46,XY karyotype and a point mutation in the SRY gene.** *J Pediatr* 1995, **126**:1022.
29. Affara NA, Chalmers IJ, Ferguson-Smith MA: **Analysis of the SRY gene in 22 sex-reversed XY females identifies four new point mutations in the conserved DNA binding domain.** *Hum Mol Genet* 1993, **2**:785-789.
30. Meyer J, Südbeck P, Held M, Wagner T, Schmitz ML, Bricarelli FD, Eggermont E, Friedrich U, Haas OA, Kobelt A, Leroy JG, Van Maldergem L, Michel E, Mitulla B, Pfeiffer RA, Schinzel A, Schmidt H, Scherer G: **Mutational analysis of the SOX9 gene in campomelic dysplasia and autosomal sex reversal: lack of genotype/phenotype correlations.** *Hum Mol Genet* 1997, **6**:91-98.
31. Scherer G, Held M, Erdel M, Meschede D, Horst J, Lesniewicz R, Midro AT: **Three novel SRY mutations in XY gonadal dysgenesis and the enigma of XY gonadal dysgenesis cases without SRY mutations.** *Cytogenet Cell Genet* 1998,**80**:188-192.
32. Kwok C, Weller PA, Guioli S, Foster JW, Mansour S, Zuffardi O, Punnett HH, Dominguez-Steglich MA, Brook JD, Young ID, Goodfellow PN, Schafer AJ: **Mutations in SOX9, the gene responsible for Campomelic dysplasia and autosomal sex reversal.** *Am J Hum Genet* 1995, **57**:1028-1036.
33. Goji K, Nishijima E, Tsugawa C, Nishio H, Pokharel RK, Matsuo M: **Novel missense mutation in the HMG box of SOX9 gene in a Japanese XY male resulted in campomelic dysplasia and severe defect in masculinization.** *Hum Mutat* 1998, (Suppl 1):S114-116.
34. Haqq CM, King CY, Ukiyama E, Falsafi S, Haqq TN, Donahoe PK, Weiss MA: **Molecular basis of mammalian sexual determination: activation of Müllerian inhibiting substance gene expression by SRY.** *Science* 1994, **266**:1494-1500.
35. Irrthum A, Devriendt K, Chitayat D, Matthijs G, Glade C, Steijlen PM, Fryns JP, Van Steensel MA, Vikkula M: **Mutations in the transcription factor gene SOX18 underlie recessive and dominant forms of hypotrichosis-lymphedema-telangiectasia.** *Am J Hum Genet* 2003, **72**:1470-1478.
36. Imai A, Takagi A, Tamaya T: **A novel sex-determining region on Y (SRY) missense mutation identified in a 46,XY female and also in the father.** *Endocr J* 1999, **46**:735-739.
37. Okuhara K, Tajima T, Nakae J, Fujieda K: **A novel missense mutation in the HMG box region of the SRY gene in a Japanese patient with an XY sex reversal.** *J Hum Genet.* 2000, **45**:112-114.

38. Cunha JL, Soardi FC, Bernardi RD, Oliveira LE, Benedetti CE, Guerra-Junior G, Maciel-Guerra AT, de Mello MP: **The novel p.E89K mutation in the SRY gene inhibits DNA binding and causes the 46,XY disorder of sex development.** *Braz J Med Biol Res* 2011, **44**:361-365.
39. Hawkins JR, Taylor A, Goodfellow PN, Migeon CJ, Smith KD, Berkovitz GD: **Evidence for increased prevalence of SRY mutations in XY females with complete rather than partial gonadal dysgenesis.** *Am J Hum Genet* 1992, **51**:979-984.
40. Schmitt-Ney M, Thiele H, Kaltwasser P, Bardoni B, Cisternino M, Scherer G: **Two novel SRY missense mutations reducing DNA binding identified in XY females and their mosaic fathers.** *Am J Hum Genet* 1995, **56**:862-869.
41. Bondurand N, Kuhlbrodt K, Pingault V, Enderich J, Sajus M, Tommerup N, Warburg M, Hennekam RC, Read AP, Wegner M, Goossens M: **A molecular analysis of the yemenite deaf-blind hypopigmentation syndrome: SOX10 dysfunction causes different neurocristopathies.** *Hum Mol Genet* 1999, **8**:1785-1789.
42. Shahid M, Dhillon VS, Hussain Z, Masa JF, Aslam M, Raish M, Ahmad A, Khan NJ, Prasad S, Batra S, Pasha ST, Husain SA: **Analysis of the SRY gene in two sex-reversed XY sisters identifies two new novel point mutations in the high mobility group box domain.** *Fertil Steril* 2008, **90**:1199.
43. Schäffler A, Barth N, Winkler K, Zietz B, Rümmele P, Knüchel R, Schölmerich J, Palitzsch KD: **Identification of a new missense mutation (Gly95Glu) in a highly conserved codon within the high-mobility group box of the sex-determining region Y gene: report on a 46,XY female with gonadal dysgenesis and yolk-sac tumor.** *J Clin Endocrinol Metab* 2000, **85**:2287-2292.
44. Hawkins JR, Taylor A, Berta P, Levilliers J, Van der Auwera B, Goodfellow PN: **Mutational analysis of SRY: nonsense and missense mutations in XY sex reversal.** *Hum Genet* 1992, **88**:471-474.
45. Braun A, Kammerer S, Cleve H, Löhns U, Schwarz HP, Kuhnle U: **True hermaphroditism in a 46,XY individual, caused by a postzygotic somatic point mutation in the male gonadal sex-determining locus (SRY): molecular genetics and histological findings in a sporadic case.** *Am J Hum Genet* 1993, **52**:578-585.
46. Jakubiczka S, Bettecken T, Stumm M, Neulen J, Wieacker P: **Another mutation within the HMG-box of the SRY gene associated with Swyer syndrome.** *Hum. Mutat* 1999, **13**:85.
47. Jäger RJ, Harley VR, Pfeiffer RA, Goodfellow PN, Scherer G: **A familial mutation in the testis-determining gene SRY shared by both sexes.** *Hum Genet* 1992, **90**:350-355.
48. Preiss S, Argentaro A, Clayton A, John A, Jans DA, Ogata T, Nagai T, Barroso I, Schafer AJ, Harley VR: **Compound effects of point mutations causing campomelic dysplasia/autosomal sex reversal upon SOX9 structure, nuclear transport, DNA binding, and transcriptional activation.** *J Biol Chem* 2001, **276**:27864-27872.
49. Zeng YT, Ren ZR, Zhang ML, Huang Y, Zeng FY, Huang SZ: **A new de novo mutation (A113T) in HMG box of the SRY gene leads to XY gonadal dysgenesis.** *J Med Genet* 1993, **30**:655-657.

50. Poulat F, Soullier S, Gozé C, Heitz F, Calas B, Berta P: **Description and functional implications of a novel mutation in the sex-determining gene SRY.** *Hum Mutat* 1994,**3**:200-204.
51. Jordan BK, Jain M, Natarajan S, Frasier SD, Vilain E: **Familial mutation in the testis-determining gene SRY shared by an XY female and her normal father.** *J Clin Endocrinol Metab* 2002, **87**:3428-3432.
52. Lundberg Y, Ritzen M, Harlin J : **Novel missense mutation (P131R) in the HMG box of SRY in XY sex reversal.** *Hum mutat* 1998 (Suppl 1):S328.
